# Supplementary material for: Developing a hydrological monitoring and sub-seasonal to seasonal forecasting system for South and Southeast Asian river basins
Source: Copernicus journal article supplement (doi:10.5194/hess-2020-362), 2020-07-27
Supplement: Supplementary file [file hess-2020-362-AC2-supplement.pdf]

Table 1: Summary of datasets used in this study. The meteorological forcing fields include precipitation (precip), downward long-wave radiation (LW), downward shortwave radiation (SW), air temperature (Ta), specific humidity (Q), surface air pressure (P), zonal (U), and meridional (V) wind speed.

| Data        | Period of Record    | Spatial resolution                                  | Temporal resolution | Variable used                  | Reference                           |
|-------------|---------------------|-----------------------------------------------------|---------------------|--------------------------------|-------------------------------------|
| CHIRPS      | 1981-present        | 0.05°                                               | 1 day               | Precip                         | Funk et al., 2015                   |
| GDAS        | 2000-present        | 1° × 1°<br>gradually improved to<br>0.125° × 0.125° | 6 hours             | LW, SW, Ta, Q, P, U, V         | National Climatic Data Center, 2020 |
| GEOS-S2S-V1 | 1981-2018<br>Jan    | 1°×1.25°                                            | 1 day               | Precip, LW, SW, Ta, Q, P, U, V | Borovikov et al., 2017              |
| GEOS-S2S-V2 | 1981-present        | 0.5°×0.5°                                           | 1 day               | Precip, LW, SW, Ta, Q, P, U, V | Molod et al., 2020                  |
| ESA-CCI SM  | 1978 Nov - 2019 Dec | 0.25°×0.25°                                         | 1 day               | Surface soil moisture          | Gruber et al., 2019                 |

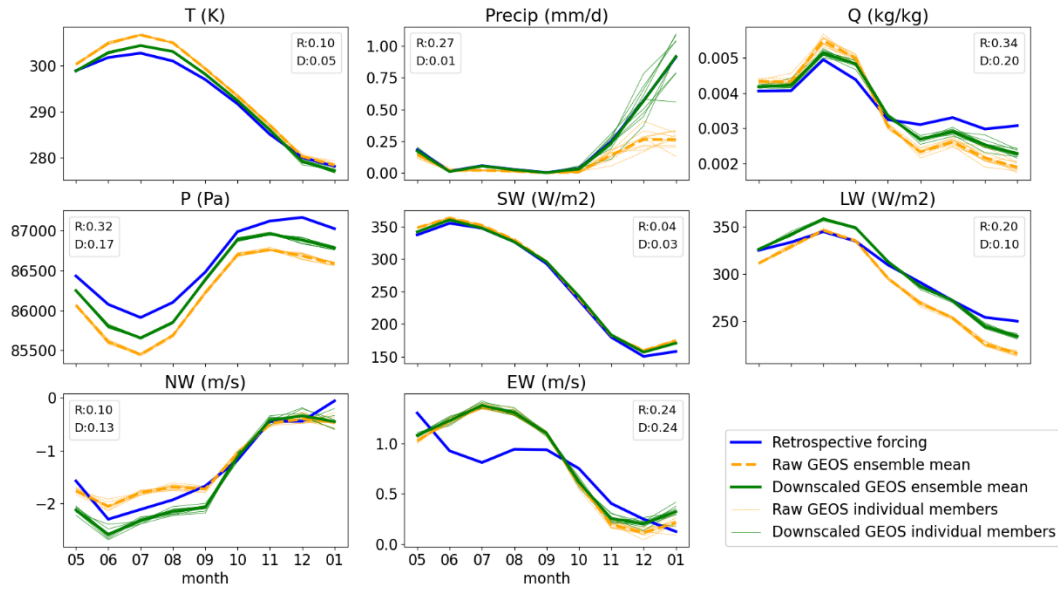

**Figure S1: Comparison of Air temperature (T), precipitation (Precip), specific humidity (Q), surface pressure (P), solar radiation (SW), longwave radiation (LW), north-south wind speed (NW), east-west wind speed (EW) among Retrospective, raw GEOS-S2S-V1 and downscaled GEOS-S2S-V1 meteorological forcing in the Helmand basin. The root mean squared error normalized by the range of the retrospective meteorological forcing (NRMSE) is shown as the values in each subplot. R denotes the NRMSE between raw GEOS-S2S-V1 and retrospective forcing and D denotes the NRMSE between downscaled GEOS-S2S-V1 and retrospective forcing.**

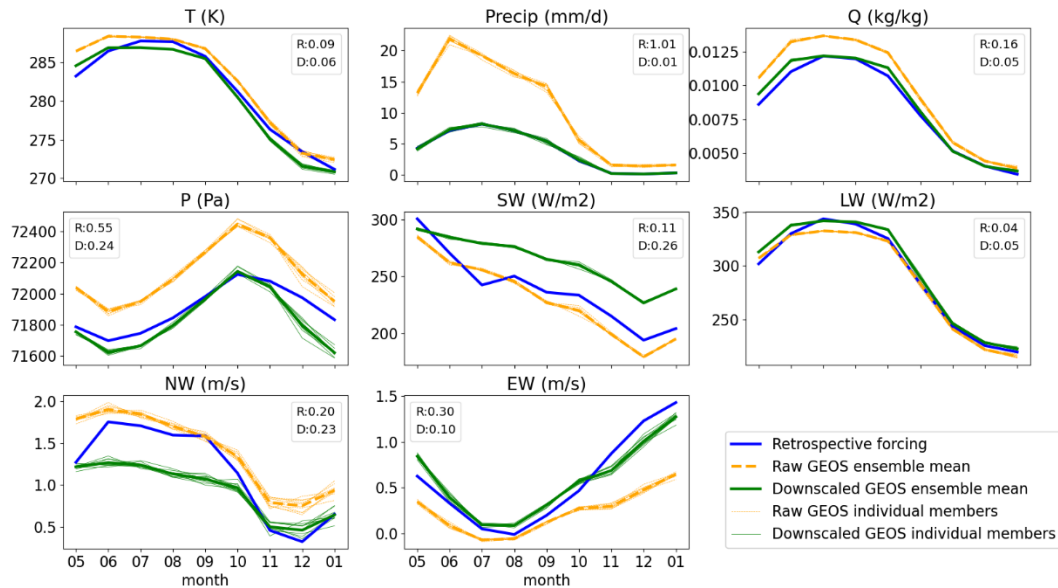

**Figure S2: The same as Fig. S1 but in the Brahmaputra basin.**

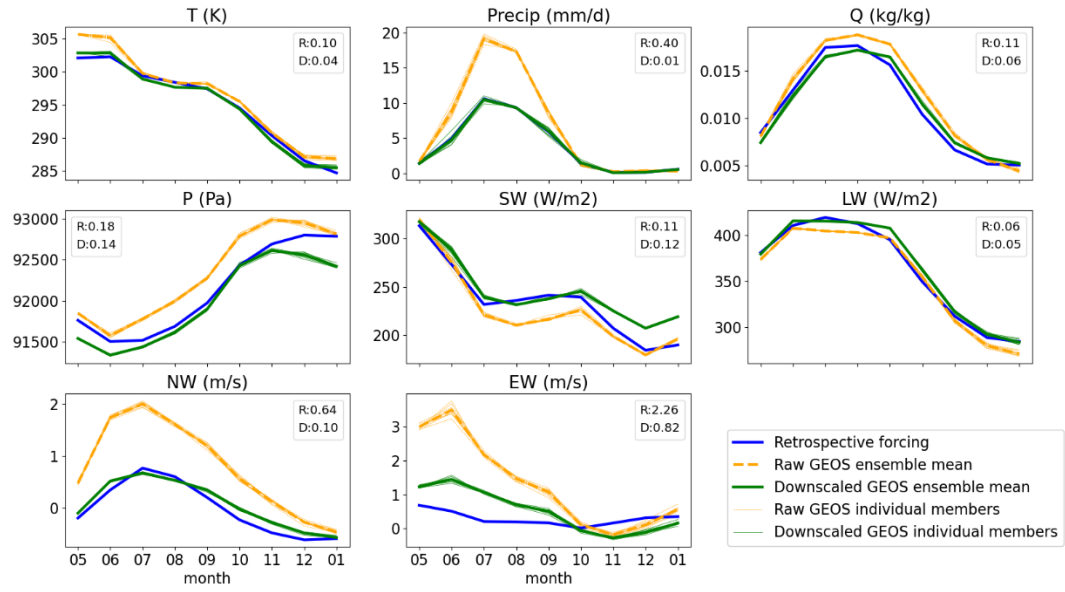

Figure S3: The same as Fig. S1 but in the Ganges basin

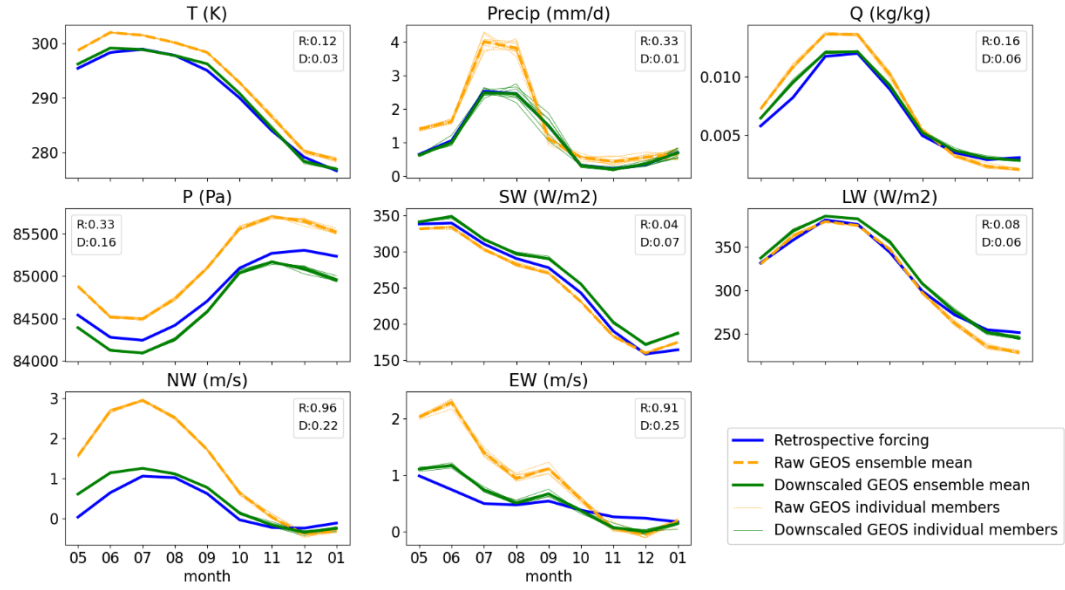

Figure S4: The same as Fig. S1 but in the Indus basin

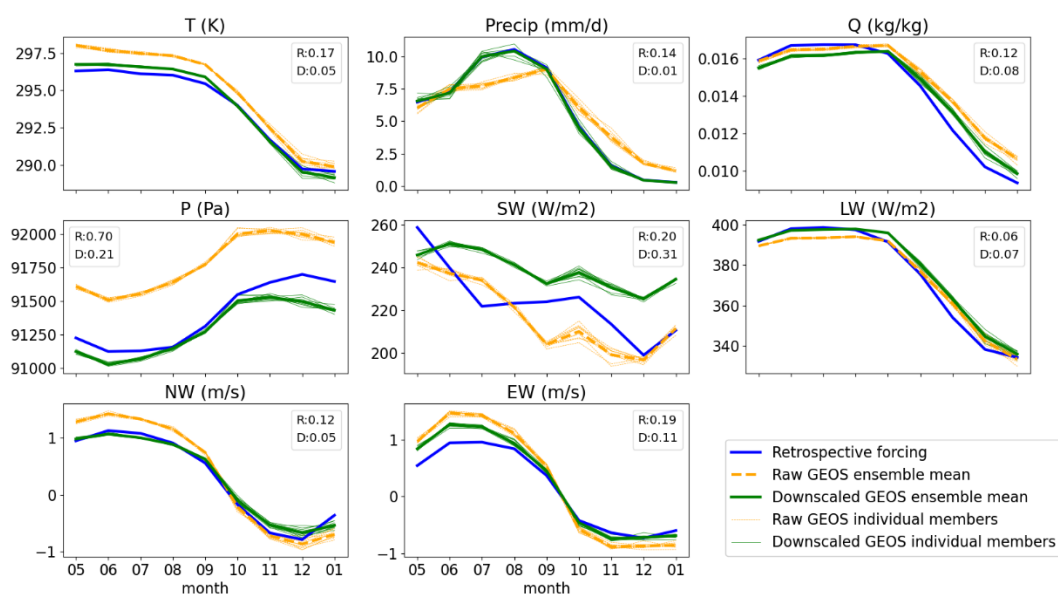

Figure S5: The same as Fig. S1 but in the Mekong basin

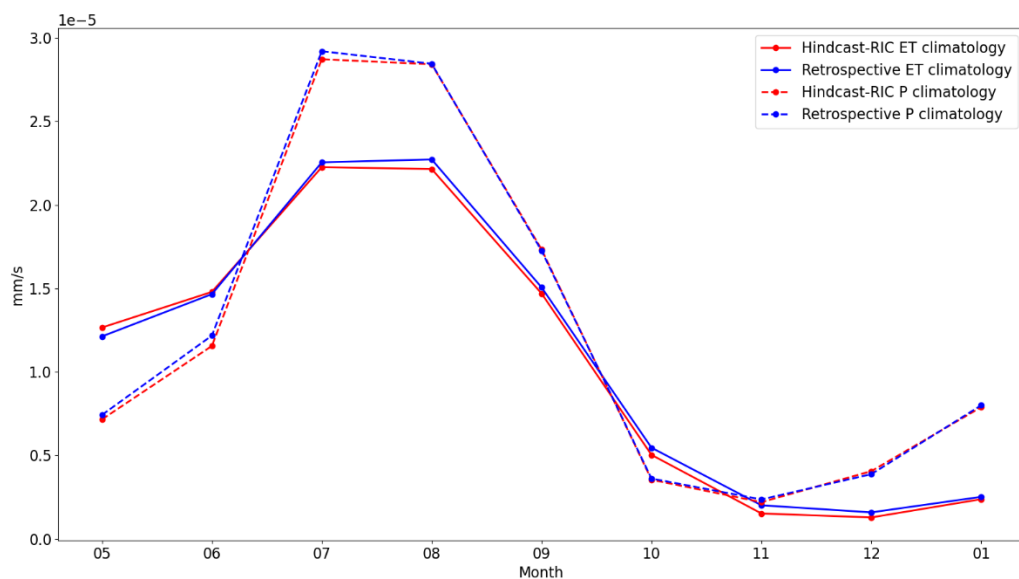

Figure S6. The climatological monthly precipitation and evapotranspiration (ET) in the Indus basin from retrospective and hindcast-RIC simulations.

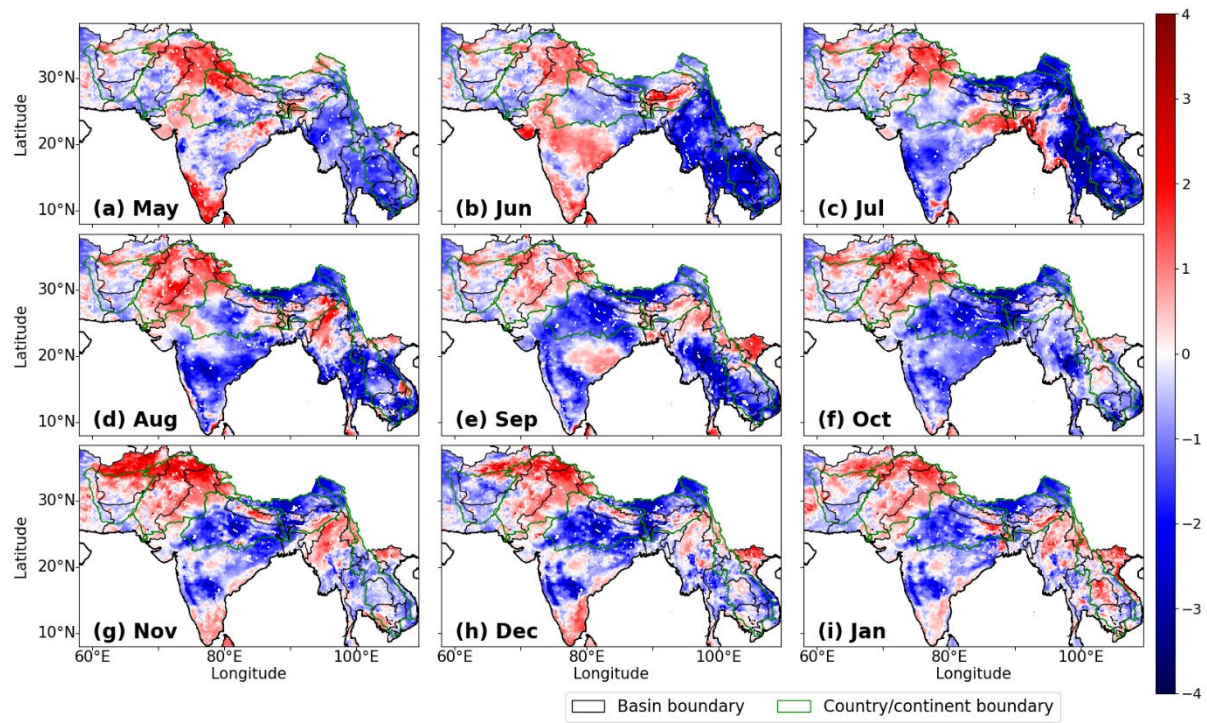

**Figure S11. The spatial distribution of monthly RZSM standardized anomaly for 2015 South and Southeast Asia drought calculated from the retrospective simulation**

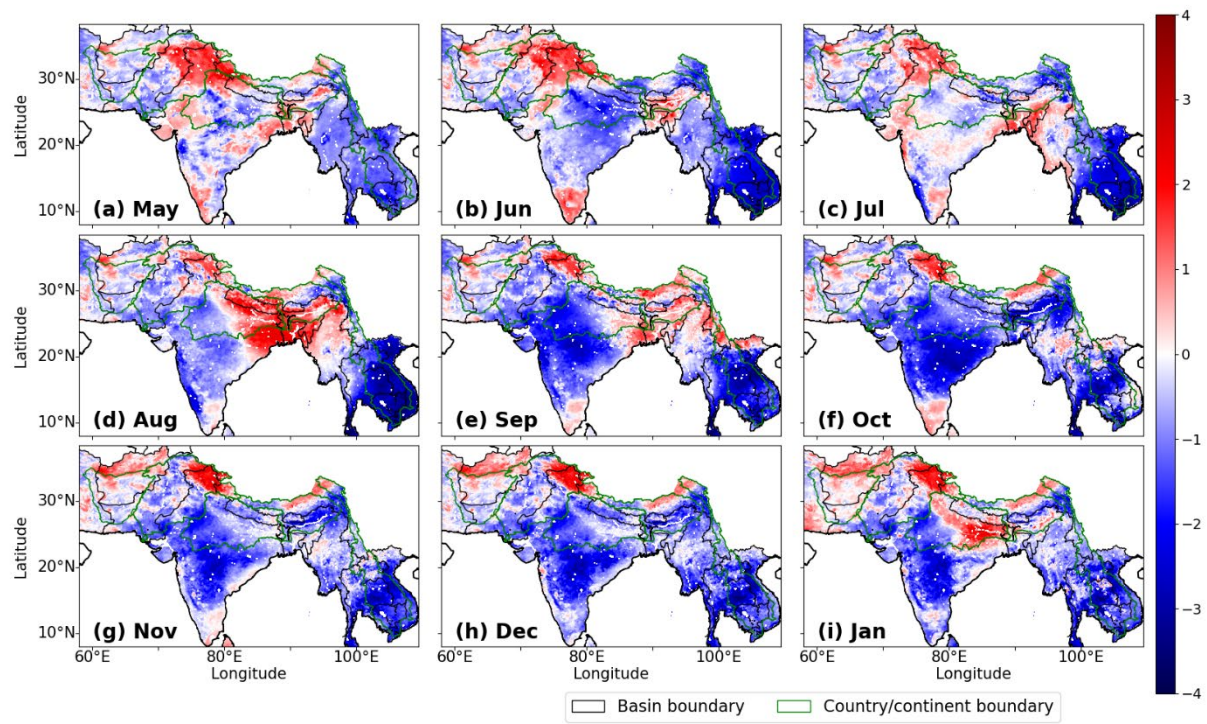

**Figure S12.** The same as Fig. S12 but calculated from ensemble mean of the hindcast-RIC simulation
